# Supplementary material for: Scarless Gene Tagging with One-Step Transformation and Two-Step Selection in Saccharomyces cerevisiae and Schizosaccharomyces pombe
Source: PubMed Central journal article supplement (PMC5063382; doi:10.1371/journal.pone.0163950), 2016-10-13
Supplement: pone.0163950.s010.pdf [file pone.0163950.s010.pdf]

**S1 Table. *S. cerevisiae* and *S. pombe* strains used in this study.**

| <b>Strain</b> | <b>Description</b>                                                                                                       | <b>Marker</b>     | <b>Reference</b> |
|---------------|--------------------------------------------------------------------------------------------------------------------------|-------------------|------------------|
| 4436          | W303 <i>MATa can1-100 his3-11,15 leu2-3,112 ura3-1 trp1-1</i>                                                            | -                 | Lab collection   |
| 4437          | W303 <i>MATα can1-100 his3-11,15 leu2-3,112 ura3-1 trp1-1</i>                                                            | -                 | Lab collection   |
| 4437-LEU2     | W303 <i>MATα can1-100 his3-11,15 leu2::pNH605 ura3-1 trp1-1</i>                                                          | <i>LEU2</i>       | This study       |
| yDML77        | 4436 <i>TRP1 PRE1-mNeonGreen</i> (non-yeast codon-optimized)- <i>T<sub>ADH1</sub>-C.g. HIS3</i>                          | <i>TRP1, HIS3</i> | This study       |
| yDML78        | 4436 <i>TRP1 PRE1-mNeonGreen-T<sub>ADH1</sub>-C.g. HIS3</i>                                                              | <i>TRP1, HIS3</i> | This study       |
| yDML226       | 4437 mCherry- <i>RSP5</i>                                                                                                | -                 | This study       |
| yDML231       | 4437 mCherry- <i>YPT1</i>                                                                                                | -                 | This study       |
| yDML242       | W303 <i>MATa/MATα can1-100/can1-100 his3-11,15/his3-11,15 leu2-3,112/leu2::pNH605 ura3-1/ura3-1 trp1::pNH604/ trp1-1</i> | <i>LEU2, TRP1</i> | This study       |
| yDML248       | 4436 <i>P<sub>SEC4</sub>-mNeonGreen-SEC4</i>                                                                             | -                 | This study       |
| yDML249       | 4436 <i>P<sub>YPT6</sub>-mNeonGreen-YPT6</i>                                                                             | -                 | This study       |
| yDML250       | 4436 <i>P<sub>YPT7</sub>-mNeonGreen-YPT7</i>                                                                             | -                 | This study       |
| yDML251       | 4436 <i>P<sub>YPT10</sub>-mNeonGreen-YPT10</i>                                                                           | -                 | This study       |
| yDML252       | 4436 <i>P<sub>YPT11</sub>-mNeonGreen-YPT11</i>                                                                           | -                 | This study       |
| yDML253       | 4436 <i>P<sub>YPT31</sub>-mNeonGreen-YPT31</i>                                                                           | -                 | This study       |
| yDML254       | 4436 <i>P<sub>YPT32</sub>-mNeonGreen-YPT32</i>                                                                           | -                 | This study       |
| yDML255       | 4436 <i>P<sub>YPT52</sub>-mNeonGreen-YPT52</i>                                                                           | -                 | This study       |
| yDML256       | 4436 <i>P<sub>YPT53</sub>-mNeonGreen-YPT53</i>                                                                           | -                 | This study       |
| yDML260       | yR-a-60 <i>HO::pDML112</i>                                                                                               | <i>NAT</i>        | This study       |
| yDML261       | 4436 <i>trp1::pNH604-P<sub>RSP5</sub>-RSP5-mNeonGreen HO::pDML112</i>                                                    | <i>TRP1, NAT</i>  | This study       |
| yDML262       | 4436 <i>trp1::pNH604-P<sub>RSP5</sub>-mNeonGreen-RSP5 HO::pDML112</i>                                                    | <i>TRP1, NAT</i>  | This study       |
| yDML263       | yR-a-298 <i>HO::pDML112</i>                                                                                              |                   | This study       |
| yDML264       | 4436 <i>P<sub>VPS21</sub>-mNeonGreen-VPS21</i>                                                                           | -                 | This study       |
| yDML265       | 4436 <i>TDH3-mNeonGreen</i>                                                                                              | -                 | This study       |
| yDML267       | 4436 <i>PRE1-mNeonGreen</i>                                                                                              | -                 | This study       |
| yR-a-2        | 4436 <i>trp1::pNH604</i>                                                                                                 | <i>TRP1</i>       | This study       |
| yR-a-47       | 4436 <i>PRE1-mNeonGreen-T<sub>ADH1</sub>-C.g. TRP1</i>                                                                   | <i>TRP1</i>       | This study       |
| yR-a-60       | 4436 <i>RSP5-mNeonGreen-T<sub>ADH1</sub>-C.g. TRP1</i>                                                                   | <i>TRP1</i>       | This study       |
| yR-a-136      | 4436 <i>TDH3-mNeonGreen-T<sub>ADH1</sub>-C.g. TRP1</i>                                                                   | <i>TRP1</i>       | This study       |
| yR-a-298      | 4436 <i>trp1::pNH604 P<sub>RSP5</sub>-mNeonGreen-RSP5</i>                                                                | <i>TRP1</i>       | This study       |
| yR-a-299      | 4436 <i>trp1::pNH604 P<sub>YPT1</sub>-mNeonGreen-YPT1</i>                                                                | <i>TRP1</i>       | This study       |

|        |                                                             |             |             |
|--------|-------------------------------------------------------------|-------------|-------------|
| FWP10  | <i>ura4-294, h-</i>                                         | -           | Winston lab |
| FWP172 | <i>ade6-m210, leu1-32, ura4-D18, h-</i>                     | -           | Winston lab |
| DH0    | <i>ade6::ade6+, leu1-32, ura4-D18, h-</i>                   | <i>ade6</i> | This study  |
| DH159  | <i>tdh1-NmGFPmut3-ura4-mGFPmut3, ura4-D18, leu1-32, h-</i>  | <i>ura4</i> | This study  |
| DH160  | <i>tdh1-mGFPmut3, ura4-D18, leu1-32, h-</i>                 | <i>ura4</i> | This study  |
| DH178  | <i>tdh1- NmGFPmut3-kanMX6-HSV1tk-mGFPmut3, ura4-294, h-</i> | kanMX6      | This study  |
| DH179  | <i>tdh1-mGFPmut3, ura4-294, h-</i>                          | -           | This study  |
