# Supplementary material for: Scarless Gene Tagging with One-Step Transformation and Two-Step Selection in Saccharomyces cerevisiae and Schizosaccharomyces pombe
Source: PubMed Central journal article supplement (PMC5063382; doi:10.1371/journal.pone.0163950), 2016-10-13
Supplement: pone.0163950.s011.pdf [file pone.0163950.s011.pdf]

**S2 Table. *E. coli* plasmids used in this study.**

| <b>Plasmid</b> | <b>Description</b>                                                                                                                                                                | <b>Marker</b>            | <b>Reference</b> |
|----------------|-----------------------------------------------------------------------------------------------------------------------------------------------------------------------------------|--------------------------|------------------|
| pDML20         | pFA6a-linker(5xGA)-msfGFP-T <sub>ADH1</sub> -kanMX6                                                                                                                               | Amp; G418                | This study       |
| pDML61         | pFA6a-linker(5xGA)-msfGFP-T <sub>ADH1</sub> - <i>C.g. HIS3</i>                                                                                                                    | Amp; <i>HIS3</i>         | This study       |
| pDML63         | pFA6a-linker(5xGA)-mNeonGreen (non-yeast codon-optimized)-T <sub>ADH1</sub> - <i>C.g. HIS3</i>                                                                                    | Amp; <i>HIS3</i>         | This study       |
| pDML99         | pFA6a-linker(5xGA)-mNeonGreen-T <sub>ADH1</sub> - <i>C.g. HIS3</i>                                                                                                                | Amp; <i>HIS3</i>         | This study       |
| pDML112        | pFA6- <i>HO</i> -P <sub>TDH3</sub> -mCherry -T <sub>ADH1</sub> -NAT- <i>HO</i>                                                                                                    | Amp; NAT                 | This study       |
| pDML145        | pNH604-P <sub>TDH3</sub> -mNeonGreen-T <sub>ADH1</sub>                                                                                                                            | Amp; <i>TRP1</i>         | This study       |
| pDML152        | pFA6a-linker(5xGA)-mNeonGreen-T <sub>ADH1</sub> - <i>C.g. TRP1</i>                                                                                                                | Amp; <i>TRP1</i>         | This study       |
| pDML166        | pNH604-P <sub>EF1<math>\alpha</math></sub> -mNeonGreen-T <sub>ADH1</sub>                                                                                                          | Amp; <i>TRP1</i>         | This study       |
| pDML190        | pFA6a-mNeonGreen <sub>(1-177)</sub> - <i>K.l. URA3</i> -P <sub>EF1<math>\alpha</math></sub> -M-mNeonGreen <sub>(60-236)</sub> -linker(5xGA)                                       | Amp; <i>URA3</i>         | This study       |
| pDML193        | pFA6a-mCherry <sub>(1-177)</sub> - <i>K.l. URA3</i> -P <sub>EF1<math>\alpha</math></sub> -M-mCherry <sub>(60-236)</sub> -linker(5xGA)                                             | Amp; <i>URA3</i>         | This study       |
| pDML200        | pFA6a-GSG-mNeonGreen <sub>(3-177)</sub> - <i>K.l. URA3</i> -mNeonGreen <sub>(60-236)</sub> -GSG                                                                                   | Amp; <i>URA3</i>         | This study       |
| pDML219        | pFA6a-linker(5xGA)-mNeonGreen <sub>(5-177)</sub> - <i>K.l. URA3</i> -mNeonGreen <sub>(60-236)</sub> -Stop                                                                         | Amp; <i>URA3</i>         | This study       |
| pDML222        | pFA6a-mNeonGreen <sub>(1-177)</sub> - <i>K.l. URA3</i> -P <sub>EF1<math>\alpha</math></sub> -mNeonGreen <sub>(non-yeast,1-59)</sub> -mNeonGreen <sub>(60-236)</sub> -linker(5xGA) | Amp; <i>URA3</i>         | This study       |
| pDML223        | pFA6a-linker(5xGA)-mNeonGreen <sub>(5-177)</sub> -mNeonGreen <sub>(non-yeast, 178-236)</sub> - <i>K.l. URA3</i> -mNeonGreen <sub>(60-236)</sub> -Stop                             | Amp; <i>URA3</i>         | This study       |
| pNH603         | Single-copy <i>his3</i> integration vector with <i>C.g. HIS3</i> marker                                                                                                           | Amp; <i>HIS3</i>         | [1]              |
| pNH604         | Single-copy <i>trp1</i> integration vector with <i>C.g. TRP1</i> marker                                                                                                           | Amp; <i>TRP1</i>         | [1]              |
| pUG72          | Plasmid with loxP-flanked <i>K.l. URA3</i> marker                                                                                                                                 | Amp; <i>URA3</i>         | [2]              |
| pDH149         | pFA6a-AfeI-linker-NmGFPmut3 <sub>(2-158)</sub> - <i>ura4</i> -mGFPmut3-BclI                                                                                                       | Amp;<br><i>ura4</i>      | This study       |
| pDH165         | pFA6a-AfeI-linker-NmGFPmut3 <sub>(2-158)</sub> -kanMX6-HSV1tk-mGFPmut3-BclI                                                                                                       | Amp;<br>kanMX6<br>HSV1tk | This study       |
| pDH193         | pFA6a-AfeI-linker-NmGFPmut3 <sub>(2-158)</sub> - <i>ura4</i> -mGFPmut3-HindIII                                                                                                    | Amp;<br><i>ura4</i>      | This study       |

## References

1. Chau AH, Walter JM, Gerardin J, Tang C, Lim WA. Designing synthetic regulatory networks capable of self-organizing cell polarization. *Cell*. 2012;151: 320–332. doi:10.1016/j.cell.2012.08.040
2. Gueldener U, Heinisch J, Koehler GJ, Voss D, Hegemann JH. A second set of loxP marker cassettes for Cre-mediated multiple gene knockouts in budding yeast. *Nucleic Acids Res*. 2002;30: e23.
