# Supplementary material for: Scarless Gene Tagging with One-Step Transformation and Two-Step Selection in Saccharomyces cerevisiae and Schizosaccharomyces pombe
Source: PubMed Central journal article supplement (PMC5063382; doi:10.1371/journal.pone.0163950), 2016-10-13
Supplement: pone.0163950.s012.pdf [file pone.0163950.s012.pdf]

**S3 Table. Primers used in this study.**

| <b>Name</b> | <b>Sequence</b>                                                  |
|-------------|------------------------------------------------------------------|
| DML_P37_R   | TAAAACCTAAGAGTCACTTTAAAATTTGTATACAC                              |
| DML_P74_F   | TCAGTCCTTCTTTAGAAGAGTGAGTGCG                                     |
| DML_P75_R   | CACGCCAAGAAACCCTTGATCC                                           |
| DML_P110_F  | TCGTACGCTGCAGGTCGACGGATCCCCGGGTTAATTAACGGAGCAGGTGCTGG<br>TG      |
| DML_P111_R  | ATAAATCATAAGAAATTCGCTTATTTAGAAGTGGCGCGCCTTACTTGTACAA<br>TTC      |
| DML_P218_F  | TAACGGAGCAGGTGCTGGTGCTGGCGCCGGTGCAGGCGAGGAGGATAACATG<br>GCC      |
| DML_P219_R  | AGAAATTCGCTTATTTAGAAGTGGCGCGCCTTACTTGTACAGCTCGTCCATGC<br>CC      |
| DML_P285_F  | CCGCTAGGGATAACAGGGTAATATAGATCTGGCTCTATATGTATATAAAGCT<br>GCGGATGC |
| DML_P286_R  | TGATATCATCGATGAATTCGAGCTCGTTTAAACCAAAGCCGAATCCACCACGG<br>TC      |
| DML_P368_F  | AATTTGGTTACCACACTGACCTGTGCG                                      |
| DML_P369_R  | CGCTTGTCCTTTAAATCACACTTGTTACC                                    |
| DML_P371_F  | AGCGGTACCGGGCCCAAATACCTCGAGACAGTTTATTCCTGGCATCCACTAAA<br>TATAATG |
| DML_P379_F  | TAGTTTTGTTAGGCAAGAATTAGCCAAGTC                                   |
| DML_P380_R  | GCGCATTAACAACATGAGATGACAGC                                       |
| DML_P405_R  | GTTTGTATTATGTGTGTTTATTCGAAACTAAGTTC                              |
| DML_P442_R  | GAGCTCCACCGCGGTGGCGGCCGCTTACTTGTACAATTCGTCCATACCATAA<br>CG       |
| DML_P444_F  | CACACATAAACAAACATCGATTAACAAAATGGTTTCTAAGGGTGAAGAAGAC<br>AACATGGC |
| DML_P461_R  | ATCCCTGTGTGCTTAGGATCAGATCTATATTACCCTGTTATCCCTAGCGG               |
| DML_P462_F  | GATAACAGGGTAATATAGATCTGATCCTAAGCACACAGGGATTGTTGTAC               |
| DML_P463_R  | TATCATCGATGAATTCGAGCTCGTTTAAACGCTGATTAGTTATCACATTTTAT<br>CCCTATG |
| DML_P476_R  | ACCGTCTGGGTATGGCAAGTATTGG                                        |
| DML_P499_F  | AGCGGTACCGGGCCCAAATACCTCGAGACTATACATAATTTACCGTTCAGAA<br>TGCAATG  |
| DML_P500_R  | CCTTAGAAACCATTTTGTTAATCGATATTTGTAATTAAACTTAGATTAGAT<br>TGCTATGC  |
| DML_P504_R  | TGTAATAAAATGCGTTACCACCATCC                                       |
| DML_P528_R  | AAAAGATCACGTGATCTGTTGTATTGGG                                     |
| DML_P555_F  | AAGCTTCGTACGCTGCAGGTCGACGGATCCATGGTTTCTAAGGGTGAAGAAG<br>ACAACATG |
| DML_P556_R  | TGTTGTATTGGGATCTCTAGAGTATCTCTTACCGTTACCAGTAGTGTAAGACC<br>AC      |

|            |                                                                                                     |
|------------|-----------------------------------------------------------------------------------------------------|
| DML_P557_F | CTGGTAACGGTAAGAGATACTCTAGAGATCCCAATACAACAGATCACGTG                                                  |
| DML_P558_R | CGGGTAAATTATGTATAGTCCCGGGAGCTCGTTTTATTTAGGTTCTATCGAGG<br>AG                                         |
| DML_P559_F | CTAAATAAAACGAGCTCCCGGGACTATACATAATTTACCCGTTCAGAATGCAA<br>TG                                         |
| DML_P560_R | CCAAGATCCATGGTTTGTTAATCGATATTTGTAATTAAACTTAGATTAGAT<br>TGC                                          |
| DML_P561_F | AAGTTTTAATTACAAATATCGATTAACAAACCATGGATCTTGGTTCCACACA<br>TCG                                         |
| DML_P562_R | GGAGACCGGCAGATCCGCGGCCGCATAGGCCACTAGTTGCACCAGCACCAGCA<br>CCAGCGCCTGCTCCCTTGTACAATTCGTCCATACCCATAACG |
| DML_P584_F | CCAATGGCTGCTAACTACTTGAAGAACC                                                                        |
| DML_P587_F | GCTGTCAGTTTTTTCCACAGTTTTGG                                                                          |
| DML_P588_R | AGCAGTATCTTCATCCAAATGGCCC                                                                           |
| DML_P608_F | TCTAAGTTTTAATTACAAATATCGATTAACAAAATGCCATGGATCTTGGTTC<br>CACACATC                                    |
| DML_P609_R | TTCTTCAAGTAGTTAGCAGCCATTGGC                                                                         |
| DML_P619_F | GCTTCGTACGCTGCAGGTCGACGGATCCATGGTTTCTAAGGGTGAAGAAAACA<br>ACATGGC                                    |
| DML_P620_R | AGATCACGTGATCTGTTGTATTGGGATCTCTAGAGTGACCACCGTCCTTCAAC<br>TTCAATC                                    |
| DML_P621_F | ATCTAAGTTTTAATTACAAATATCGATTAACAAAATGCCATTGCTTGGGAC<br>ATCTTGTC                                     |
| DML_P622_R | CGGCAGATCCGCGGCCGCATAGGCCACTAGTTGCACCAGCACCAGCACCAGCG<br>CCTGCTCCCTTGTACAATTCGTCCATACCACCAGTAG      |
| DML_P626_F | TCGTACGCTGCAGGTCGACGGATCCGGCTCCGGTTCTAAGGGTGAAGAAGACA<br>ACATGGC                                    |
| DML_P630_R | GGGAGACCGGCAGATCCGCGGCCGCATAGGCCACTAGTGCCGGAACCCTTGTA<br>CAATTCGTCCATACCCATAACG                     |
| DML_P642_R | TGTGTGGAACCAAGATCCATGGCCCCGGGAGCTCGTTTTATTTAGG                                                      |
| DML_P643_F | TAAATAAAACGAGCTCCCGGGCCATGGATCTTGGTTCCACACATC                                                       |
| DML_P712_F | CGAAGAATTGAACTTGAAGTCTACTAAGGG                                                                      |
| DML_P713_R | GCAGATCCGCGGCCGCATAGGCCACTAGTTTACTTGTACAATTCGTCCATACC<br>CATAACG                                    |
| DML_P738_F | CTAATCTAAGTTTTAATTACAAATATCGATTAACAAAATGGTGAGCAAGGGC<br>GAGGAGGATAACATGGCC                          |
| DML_P739_R | TGTGGAACCAAGATCCATGGGGGAGAACTGGAGGTCACCCTTG                                                         |
| DML_P740_F | GGGTGACCTCCAGTTCTCCCCCATGGATCTTGGTTCCACACATC                                                        |
| DML_P742_F | TACTGGTAACGGTAAGAGATACCGGAGCACTGCGCGGACC                                                            |
| DML_P743_R | GATCTGTTGTATTGGGATCTCTAGATTATTTATATAGCTCGTCCATGCCATC<br>ACATC                                       |
| DML_P744_R | TGATGGCTGTACCGATAGGAACGC                                                                            |
| tdh1_C_F1  | TTTATCGATCTTGAATACATGGCCTACATGTT                                                                    |
| tdh1_C_R1  | TCCACCTCCACCACTAGCACTACCAGCGTTGTCTTGGCGGCAGTGTAG                                                    |

|           |                                                              |
|-----------|--------------------------------------------------------------|
| tdh1_C_F2 | TACACATGGCATGGATGAACTATACAAATAACTAGCTAATCATCCCGATGCT<br>AAGA |
| tdh1_C_R2 | AGATTGACAATAAACATTTTCGTTTTTGTTGATTAACATG                     |
